1     **UPTAKE OF REPRODUCTIVE, MATERNAL AND NEWBORN HEALTH IN THE**  
2                                   **CONTEXT OF COVID-19 PANDEMIC IN KENYA**

3     **Authors:** Joyce Jebet<sup>1\*</sup>, Ruth Muia<sup>2</sup>, Abednego Ongeso<sup>3</sup>, Blasio Omuga<sup>4</sup>, Grace Omoni<sup>4</sup>,  
4     Miriam Wagoro<sup>4</sup>

5     **Collaborators:** Leonard Sharia<sup>5</sup>, Ruth Kilonzo<sup>5</sup>, Fredrick Kinyenze<sup>5</sup>, Henry Mutiso<sup>6</sup>,  
6     Ngumbao Mwatete<sup>6</sup>, Zawadi Lewa<sup>6</sup>, Dan Okoro<sup>7</sup>

- 7             1. National Defence University – Kenya, Defence College of Health Sciences  
8             2. Ministry of Health, Kenya, National Cancer Institute  
9             3. Aga Khan University, Kenya, School of Nursing and Midwifery  
10            4. The University of Nairobi-Department of Nursing Sciences  
11            5. Kitui County, Division of Reproductive and Public Health  
12            6. Kilifi County, Division of Reproductive and Public Health  
13            7. UNFPA, Kenya Country Office

14  
15     \*Corresponding author: Joyce Jebet; [jjcheptum@gmail.com](mailto:jjcheptum@gmail.com)

16  
17  
18  
19  
20  
21  
22  
23  
24  
25  
26  
27  
28

## 29 Abstract

30 **Background:** The outbreak of COVID 19 in 2019 lead to destabilization of all sectors  
31 globally including access to health care. The strain on the health care system as a result  
32 of the disease outbreak led to a shift in operations in the health care system. Maternal and  
33 neonatal care was affected as women and their families could not freely access health care  
34 owing to the restrictions to curb the spread of COVID 19. This led to a risk of a reversal  
35 in the gains made in maternal and neonatal health, prompting the need to strengthen  
36 community midwifery.

37 **Aim:** The aim of this study was to strengthen community reproductive, maternal and  
38 newborn health in the context of COVID-19 pandemic in Kenya.

39 **Materials and methods:** This is part of an interventional study that sought to strengthen  
40 community maternal and neonatal health services. A baseline survey was conducted to  
41 assess the uptake of reproductive, maternal and neonatal care services in one sub-county  
42 in Kilifi and Kitui, where five wards in each sub-county were selected. An interviewer  
43 administered questionnaire was used to collect data. The sample size for the two Counties  
44 was 414.

45 **Results:** There was a total of 378 respondents mostly comprising a rural population 75.7%  
46 (n=286). Outpatient and COVID 19 services (tests and vaccine) were most sought 37.5%  
47 (n= 137) and 29.9% (n=109) respectively. Antenatal care services were sought by 26%  
48 (n=95) of the respondents, postnatal care 9% (n=33) and skilled birth attendance 8.8%  
49 (n=32).

50 **Conclusion:** The most utilized health facility services were outpatient and COVID 19  
51 services. Antenatal care was also sought, however skilled birth attendance and postnatal  
52 care services were least sought.

53

54

55

56

57

58

59

60

61

62

## 63 **Introduction**

64 Maternal and neonatal mortality is still a major public health concern in developing  
65 nations. According to the Kenya Demographic Health Survey (1) report, Kenya's  
66 maternal mortality ratio (MMR) of 362 per 100,000 live births and 23 stillbirths per 1,000  
67 was way above the Sustainable Development Goal (SDG) set target of MMR of 70 per  
68 100,000 and 12 stillbirths per 1,000 live births (2).

69 While the health facility delivery rates had increased from 43% in the year 2008/09 to  
70 62% in 2014 and 75% in 2022 according to the Kenya demographic Health Survey (KDHS)  
71 reports (3)(4), the country has challenges in moving towards attaining the Sustainable  
72 Development Goal (SDG) 3 which aims at reducing maternal mortality ratio to less than  
73 70 women per 100,000 live births, neonatal mortality rate to less than 12 per 1,000 live  
74 births. These challenges are confounded by the COVID -19 pandemic that has affected  
75 access to for maternal and neonatal health (MNH) services. According to (5), there were  
76 no significant changes on ANC attendance, Facility births, FP uptake and PNC  
77 attendance among women, however the study reported an increase in teenage  
78 pregnancy. Fresh still births increased with a marked increase in FP uptake among  
79 adolescents to include increase in Caesarean Sections among adolescents. These declining  
80 indicators have been associated with government-imposed travel restrictions, curfews,  
81 loss of many families' income and fear about COVID infections among clients seeking  
82 Reproductive, Maternal and Neonatal Health (RMNH) services in health facilities. These

83 factors poor indicators and service disruptions are likely to adversely affect the gains  
84 made in provision of Maternal and Neonatal Health services (MNH) in the country if no  
85 strategic interventions are instituted. With most published studies on COVID 19 and  
86 RMNH in Kenya being qualitative in nature, data on current trends on RMNH indicators  
87 is scanty.

88

89 To address MNH needs in the context of COVID 19, the government of Kenya developed  
90 guidelines to guide the provision of RMNH services during this period. In addition, the  
91 National Guidelines for continuity of Community Health Services was as developed to  
92 give policy direction on management of the health services at the Primary Health care  
93 level during the pandemic. Development of these Guidelines was the step towards the  
94 right direction as it was in tandem with the move towards the achievement of Universal  
95 Health Coverage by the year 2030. The Kenya country is committed to achieve the UHC  
96 through strategic strengthening of the Primary Health Care system at the community  
97 level with particular focus on Kenya Essential Package of Health (KEPH) Levels 1- 3  
98 (individuals, Households, Dispensaries and health Centres). Moreover, Universal Health  
99 Coverage was one of the presidential Flagship projects reflected on the big 4 agendas of  
100 the current government of Kenya to be institutionalized by the year 2022. Nevertheless,  
101 the in RMNH guidelines (2020) does not comprehensively address the continuity of the  
102 Reproductive, Maternal and Neonatal Health (RMNH) services in the context of  
103 COVID19 at the community level. In addition, the continuity of community health

104 services in COVID19 situation guidelines (2020) don't show an implementation  
105 framework of RMNH service provision.

106  
107 Strengthening the community reproductive, maternal and newborn health services is in  
108 line with Kenya health policy framework and SDG 3 and therefore adapting an  
109 appropriate model that has proven potential to enhance access to RMNH will guide  
110 policy direction on this area. This will provide an Impetus for reviewing/revising the  
111 existing RMNH Guidelines and the community Health guideline with a view to  
112 strengthening access to Reproductive, Maternal and Newborn Health (RMNH) services  
113 at the community level. Therefore, this intervention is timely and is likely to be highly  
114 supported if it is successful in the context of strengthening primary Health care towards  
115 achievement of Universal health Coverage making country replication feasible and much  
116 easier. The goal of the project was improve access to community RMNH services in the  
117 context of COVID -19 pandemic in Kenya.

118

## 119 **Materials and Methods**

120 This was a mixed method implementation research that utilized both quantitative study  
121 design. It was implemented through a cyclic process of implementing and learning to  
122 improve the practice. The implementation sites were Kilifi and Kitui Counties, which  
123 were purposively selected owing to their high burden for maternal and neonatal health

124 and availability of a robust community health system. A baseline survey was conducted  
125 focusing on selected community health units and the link health facilities to determine  
126 the disruptions of health services at the onset and during COVID 19 pandemic.  
127 Therefore, gap analysis baseline survey with a focus to service uptake of Reproductive,  
128 Maternal and Neonatal Health (RMNH) Service at the level of County Health  
129 Management Teams (CHMT)/ sub-County CHMT, facility service managers and service  
130 providers was conducted. Baseline assessment of the facility was conducted using a  
131 facility assessment tool, Focus Group Discussions (FGDs) with the service providers and  
132 Client exit Interviews was used.

133

## 134 **Results**

### 135 **Sociodemographic characteristics of the study participants**

136 The study enrolled 378 females aged between 16 and 59 years from Kilifi and Kitui  
137 counties (46.8% and  
138 53.2%). Their sociodemographic characteristics are outlined in Table 1. The median  
139 (interquartile range) age of the study participants was 27.0 (23.0 - 38.0) years. Those  
140 who were aged between 21-30 years were 47.4% while those between the age of 31 and  
141 40 years were 17.2%. The majority were married (65.6%), Christians (92.1%), Self-  
142 employment (72.2%) and hailed from rural areas (75.7%). Analysis of the educational

143 background of the study participants revealed that those who had primary and  
144 secondary level education were 32.8% and 40.5% respectively.

145 *Table 1: Sociodemographic characteristics of the study participants*

#### 146 **Uptake of community RMNH services**

147 A total of 221 respondents (58.5%) responded they or their family sought RMNH  
148 services during the COVID-19 era. ANC, PNC, CWC, FP and maternity services were  
149 sought by 29.5%, 14.5%, 30.7%, 10.8% and 13.3% of the respondents respectively. The  
150 service providers for RMNH services as reported by the respondents included nurses  
151 and community midwives (89.1% n=337), Community Health Volunteer (4.0% n=15)  
152 and Community Health Assistants (0.5%). Other respondents sought services from  
153 other providers who included herbalists, relatives and traditional healers (1.9% n=7),  
154 whereas others did self-medication (4.5% n=17)

155 A total of 41 respondents (10.8%) changed their provider of RMNH services from  
156 during the COVID-19 period. The reasons provided for the change included fear of  
157 getting COVID-19 infection (43.9%), health facility being designated as an isolation  
158 centre (14.6%), transport constraints (14.6%) and lack of pertinent information from the  
159 CHV (7.3%). Other reasons included unavailability of the healthcare workers (4.9%),  
160 long distance to the health centre (4.9%), and Financial constraints (4.9%).

161 Most of the study participants reported public facilities as their current health facility  
162 for seeking RMNH services and also preferred type of health facility for seeking RMNH

163 services (95.2% and 92.3% respectively). Those who were seeking RMNH services in  
164 private health facilities at the time of conducting the study were 4.2%. Additionally,  
165 7.1% reported that they preferred seeking RMNH services in private health facilities.

166 *Figure 1: Services sought during COVID-19 era*

### 167 **Uptake of community RMNH services**

168 The health care rated the uptake of RMNH services before the onset of COVID 19 as  
169 higher (57.1%) or lower (42.9%). However during the peak of COVID 19 in 2020,  
170 majority (90%) rated the services as disrupted. Most of them (63.3%) agreed that the  
171 services uptake in 2021 (post-COVID 19) were higher.

172 *Table 2: Rating the service uptake for RMNH pre- and post-COVID 19*

### 173 **Reasons for not seeking RMNH services during the COVID-19 era**

174 Most of the respondents (61.3%) reported that they were not sick/did not require  
175 RMNH services during the period under enquiry. Those who failed to seek RMNH  
176 services for fear of contracting COVID-19 infection in the health facilities were 3.9%  
177 while 1.2% reported that COVID-19 restrictions prevented them from seeking the  
178 services.

179 *Table 3: Reasons for not seeking RMNH services*

### 180 **Barriers that hindered utilization of RMNH services in the community**



181 The reported barriers included fear of acquiring COVID-19 infection (38.6%), lack of  
182 knowledge (16.7%), religion (8.7%), financial difficulties (5.6%) and unfavourable  
183 treatment from nurses (4.8%).

184 *Table 4: Barriers that prevent utilization of RMNH services in the community*

### 185 **Opportunities for improving RMNH services in the community**

186 These included increasing the number of health facilities (33.6%), bringing services to  
187 the people (18.8%), providing access to contraceptives and safe delivery (10.4%) and  
188 providing access to contraceptives and safe delivery (5.8%) (Table 4)

189 Among the suggestions to improve uptake of RMNH services were health  
190 education/promotion (34.4%), increment of health facilities (15.3%), recruitment of  
191 more health care workers (11.6%), raising awareness in the community (11.1%), and  
192 empowerment of women (8.2%) (Table 5).

193 *Table 5: Opportunities for improving RMNH services in the community*

## 194 **Discussion**

195 The respondents were aged between 16 to 59 years with a median of 27 years. This  
196 indicates that majority were a younger population. This could be explained by the  
197 Kenya's expanding pyramid population where there are younger people at the bottom.  
198 This age category is also the group which is economically productive and also in

199 reproductive matters. Age affects economic productivity in that with increasing age,  
200 there is reduced economic productivity (6).

201 The study population was a rural community with low socio-economic status evidenced  
202 by their monthly average income of less than 5,000 Kenyan shillings per month. In  
203 addition, majority of them had primary or secondary level of education as their higher  
204 achievement. There is a strong relationship between level of education and income  
205 where, a higher level of education is linked to a higher income (7,8).

206 The most sought health facility services were outpatient department services, child  
207 welfare services and COVID 19 services which included tests and vaccines. However,  
208 maternity services for skilled birth attendance and postnatal care (PNC) were least sought  
209 though antenatal care (ANC) was highly sought. This could indicate that there was a  
210 likelihood of homebirths during the time and also ignorance on postnatal care services.  
211 Although studies (9)(10) have established that women who attend ANC are more likely  
212 to have a hospital birth and subsequently seek PNC services, this study established the  
213 contrary. This could be attributed to the fear of contracting COVID 19 at the time due to  
214 rumours and misconceptions that had not been dispelled. Other reasons for not seeking  
215 care in health facilities included distance, stigma and availability of herbalists.

216

217 Access to RMNH was affected by many barriers during the COVID 19 pandemic. In the  
218 current study, barriers to accessing RMNH ranged from fear of acquiring COVID 19, lack

219 of knowledge, false information, misconceptions and myths about COVID 19 and  
220 religion. Financial and transport challenges was also a barrier. Negative attitude of health  
221 care workers also contributed to clients not seeking services. Similar findings were  
222 established in other studies (11)(12). Other than lock down and restriction of movement,  
223 distance to the health facilities also contributed as a barrier to accessing reproductive  
224 health services. This was not only unique to Kenya but other countries as well (11,13–15).  
225 The barriers during the COVID 19 pandemic opens a discussion on what could be done  
226 during the pandemic. Some of the opportunities as suggested by the respondents include  
227 creating awareness to the community, women empowerment, mass media  
228 communication and bringing services to the people. In addition, the findings of this study  
229 posits the need to utilize technology to bridge the gap of access to services. To address  
230 the gap of distance to the health facilities, there is need to have equity in distribution of  
231 the health facilities. This calls for concerted efforts by governments to address this and  
232 prevent similar challenges in case of other pandemic situations (14).

## 233 **Conclusions**

234 Uptake of reproductive, maternal and neonatal health services were affected during the  
235 COVID 19 pandemic. Several barriers including fear of contracting COVID 19, stigma,  
236 perception on lack of services and negative attitude of health care providers contributed  
237 to low uptake of services.

238

## 239 **Acknowledgments**

240 We acknowledge the United Nations People’s Fund (UNFPA) for their financial support  
241 towards this project. We also acknowledge AMREF for administration of the funds. In  
242 addition, we acknowledge Kilifi and Kitui County management for actively supporting  
243 the project.

## 244 **References**

- 245 1. KDHS. Key Indicators 2014 Kenya Demographic and Health Survey ( KDHS )  
246 Millennium Development Goals for 2015. 2014;
- 247 2. United Nations. SDG 3: Ensure Healthy Lives and Promote Wellbeing For All At  
248 All Ages [Internet]. UN Website. 2015. p. 2. Available from:  
249 <http://www.who.int/sdg/targets/en/>
- 250 3. KDHS. 2014 DEMOGRAPHIC AND HEALTH SURVEY. Kenya Natl Bur Stat.  
251 2014;
- 252 4. KNBS, ICF. Kenya Demographic and Health Survey 2022. Key Indicators Report.  
253 Kenya Natl Bur Stat Minist Heal [Internet]. 2023;5(1):1-105. Available from:  
254 <https://dhsprogram.com/pubs/pdf/PR143/PR143.pdf>
- 255 5. Shikuku DN, Nyaoke I, Gichuru S, Maina O, Eyinda M, Godia P, et al. Early  
256 indirect impact of COVID-19 pandemic on utilization and outcomes of  
257 reproductive, maternal, newborn, child and adolescent health services in Kenya.

- 258 medRxiv. 2020;
- 259 6. Domenech J, E. Jimeno &, D. Belo. The impact of ageing on the labour force and  
260 productivity : six of one , half a dozen of the other. CaixaBank research. 2020. p.  
261 2016–7.
- 262 7. Patrinos HA, Psacharopoulos G. Strong link between education and earnings. The  
263 World Bank Blogs. 2018. p. 1–7.
- 264 8. Mou W. A Quantitative Analysis of the Relationship between Education Level  
265 and Income. J Educ Humanit Soc Sci. 2023;12.
- 266 9. Fekadu GA, Ambaw F, Kidanie SA. Facility delivery and postnatal care services  
267 use among mothers who attended four or more antenatal care visits in Ethiopia:  
268 Further analysis of the 2016 demographic and health survey. BMC Pregnancy  
269 Childbirth. 2019;19(1).
- 270 10. Onwuka CI, Ezugwu EC, Obi SN, Onwuka C, Dim CC, Chigbu C, et al. Postnatal  
271 care services use by mothers: A comparative study of defaulters versus attendees  
272 of postnatal clinics in Enugu. PLoS One. 2023;18(3 March).
- 273 11. Kelly J, Gittings L, Laurenzi C, Glinski CD, Mangqalaza H, Ralayo N, et al. HIV  
274 and SRH healthcare delivery experiences of South African healthcare workers and  
275 adolescents and young people during COVID-19. Psychol Heal Med.  
276 2022;27(sup1).

- 277 12. Barua M, Chowdhury S, Saha A, Mia C, Sajow SH, Sarker M. Community-based  
278 referral transportation system for accessing emergency obstetric services in the  
279 Rohingya refugee camp during the COVID-19 pandemic in Bangladesh:  
280 facilitators and barriers through beneficiaries' and providers' lens using a mixed-  
281 method design. *Confl Health*. 2022;16(1).
- 282 13. Bolarinwa OA, Odimegwu C, Okeke SR, Ajayi K V., Sah RK. Barriers and  
283 facilitators to accessing and using sexual and reproductive health services during  
284 the COVID-19 pandemic outbreak in Africa: a protocol for a systematic review  
285 and meta-analysis. *BMJ Open*. 2023;13(6).
- 286 14. Mambo SB, Sikakulya FK, Ssebuufu R, Mulumba Y, Wasswa H, Mbina SA, et al.  
287 Challenges in Access and Utilization of Sexual and Reproductive Health Services  
288 Among Youth During the COVID-19 Pandemic Lockdown in Uganda: An Online  
289 Cross-Sectional Survey. *Front Reprod Heal*. 2022;3.
- 290 15. Juma K, Kageha E, Ushie BA, Muga W. Impact of the COVID-19 Pandemic on  
291 Sexual and Reproductive Health Services in Burkina Faso, Ethiopia, Kenya,  
292 Malawi and Uganda. APHRC [Internet]. 2022; Available from:  
293 10.13140/RG.2.2.11991.14244

294

## 295 **Other elements**

296 Tables and figures are uploaded separately.

## TABLES AND FIGURES

Table 1: Sociodemographic characteristics of the study participants

| Characteristic                | No (n=378)               | %    |
|-------------------------------|--------------------------|------|
| <b>Age (years)</b>            |                          |      |
| Range                         | 16 to 59 years           |      |
| Median (Interquartile range)  | 27.0 (23.0 - 38.0) years |      |
| Mean $\pm$ standard deviation | 29.3 $\pm$ 8.76 years    |      |
| <21                           | 55                       | 14.6 |
| 21-30                         | 179                      | 47.4 |
| 31-40                         | 65                       | 17.2 |
| 41-50                         | 52                       | 13.8 |
| >50                           | 27                       | 7.1  |
| <b>Marital status</b>         |                          |      |
| Single                        | 117                      | 31   |
| Married                       | 248                      | 65.6 |
| Widowed                       | 7                        | 1.9  |
| Divorced                      | 3                        | 0.8  |
| Separated                     | 3                        | 0.8  |
| <b>Education level</b>        |                          |      |
| None                          | 9                        | 2.4  |
| Primary                       | 124                      | 32.8 |
| Secondary                     | 153                      | 40.5 |
| College/University            | 92                       | 24.3 |
| <b>Religion</b>               |                          |      |
| Christian                     | 348                      | 92.1 |
| Muslim                        | 27                       | 7.1  |
| Other                         | 3                        | 0.8  |
| <b>Occupation</b>             |                          |      |
| Paid employment               | 93                       | 24.6 |
| Self-employment               | 273                      | 72.2 |
| Not employed/Student          | 12                       | 3.2  |
| <b>Income (KSh.)</b>          |                          |      |
| Below 1000                    | 62                       | 16.4 |
| 1000 – 3000                   | 90                       | 23.8 |
| 3001 – 5000                   | 65                       | 17.2 |
| More than 5000                | 144                      | 38.1 |
| None                          | 7                        | 1.9  |
| <b>Residence</b>              |                          |      |
| Urban                         | 92                       | 24.3 |
| Rural                         | 286                      | 75.7 |

medRxiv preprint doi: <https://doi.org/10.1101/2024.01.18.24301357>; this version posted January 20, 2024. The copyright holder for this preprint (which was not certified by peer review) is the author/funder, who has granted medRxiv a license to display the preprint in perpetuity. It is made available under a [CC-BY-NC 4.0 International license](#).

| County |     |      |
|--------|-----|------|
| Kilifi | 178 | 46.8 |
| Kitui  | 201 | 53.2 |

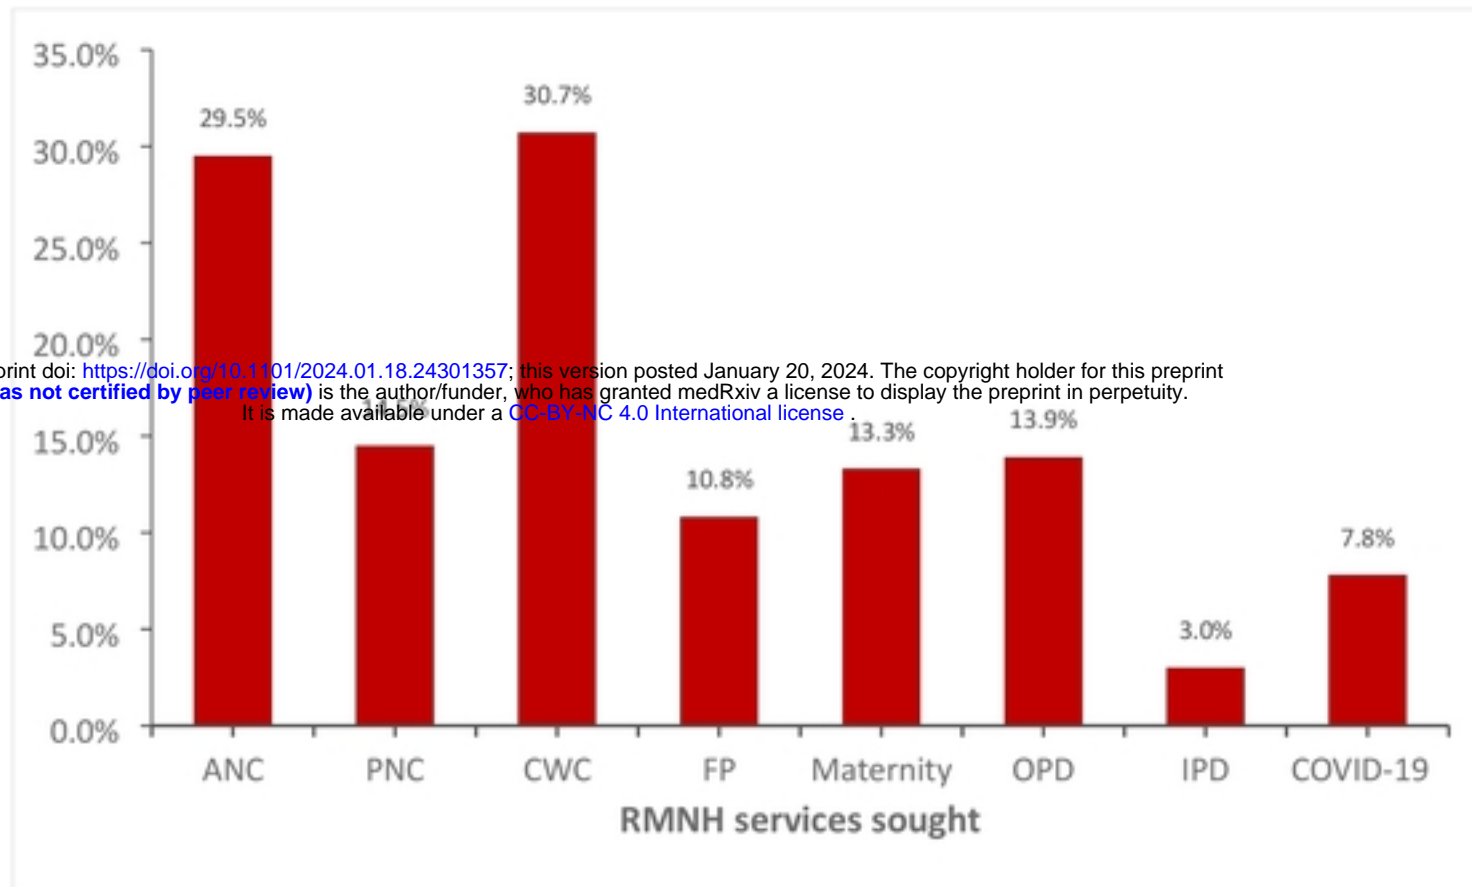

Figure 1: Services sought during COVID-19 era

Table 2: Rating the service uptake for RMNH pre- and post-COVID 19

| Question                                                                               | Category                    | Count | Column N % |
|----------------------------------------------------------------------------------------|-----------------------------|-------|------------|
| How would you rate the service uptake for RMNH before the onset of COVID 19?           | Higher                      | 16    | 57.1%      |
|                                                                                        | The same as now             | 0     | 0.0%       |
|                                                                                        | Lower                       | 12    | 42.9%      |
| How would you rate the service uptake for RMNH in the peak period of COVID in 2020?    | Service uptake not affected | 2     | 6.7%       |
|                                                                                        | Services disrupted          | 27    | 90.0%      |
|                                                                                        | Higher service uptake       | 1     | 3.3%       |
| Q19 How would you rate the service uptake for RMNH currently in 2021 compared to 2020? | Higher                      | 19    | 63.3%      |
|                                                                                        | The same as now             | 3     | 10.0%      |
|                                                                                        | Lower                       | 8     | 26.7%      |



Table 3: Reasons for not seeking RMNH services

| Reason                                                                    | Number (n=155) | %    |
|---------------------------------------------------------------------------|----------------|------|
| Not sick                                                                  | 95             | 61.3 |
| Fear of contracting COVID-19 in the health facilities                     | 6              | 3.9  |
| Had information that no drugs were available                              | 3              | 1.9  |
| Visiting the herbalist                                                    | 2              | 1.3  |
| Not aware of the services                                                 | 2              | 1.3  |
| Stigma and fear/distance and fear/Presence of herbal doctors and midwives | 2              | 1.3  |
| Advanced age                                                              | 2              | 1.3  |
| COVID-19 protocols prevented                                              | 2              | 1.3  |
| Don't Know                                                                | 2              | 1.3  |

medRxiv preprint doi: <https://doi.org/10.1101/2024.01.18.24301357>; this version posted January 20, 2024. The copyright holder for this preprint (which was not certified by peer review) is the author/funder, who has granted medRxiv a license to display the preprint in perpetuity. It is made available under a [CC-BY-NC 4.0 International license](https://creativecommons.org/licenses/by-nc/4.0/).

Table 4: Barriers that prevent utilization of RMNH services in the community

| Barrier                                                                                 | No (n-378) | %    |
|-----------------------------------------------------------------------------------------|------------|------|
| Fear of acquiring COVID-19 infection                                                    | 146        | 38.6 |
| Lack of knowledge and understanding of the importance of services/poor health education | 63         | 16.7 |
| False information, misconceptions, myths, misbeliefs etc.                               | 33         | 8.7  |
| Religion                                                                                | 21         | 5.6  |
| Financial difficulties                                                                  | 18         | 4.8  |
| Bad treatment from nurses/ health workers                                               | 16         | 4.2  |
| Long-distance to health facilities                                                      | 15         | 4.0  |
| Traditional beliefs                                                                     | 6          | 1.6  |
| Side effects of contraceptives                                                          | 4          | 1.1  |
| Transport challenges                                                                    | 4          | 1.1  |
| Others                                                                                  | 52         | 13.8 |

Table 5: Opportunities for improving RMNH services in the community

| <b>Opportunity/Solution</b>                        | <b>No (n=378)</b> | <b>%</b> |
|----------------------------------------------------|-------------------|----------|
| Increase number of health facilities               | 127               | 33.6     |
| Bring services to the people                       | 71                | 18.8     |
| Provide access to contraceptives and safe delivery | 61                | 16.2     |
| Recruit/train more health workers                  | 20                | 5.3      |
| Mass communication and creation of awareness       | 19                | 5.0      |
| Provide access to contraception and safe abortion  | 16                | 4.2      |
| <b>Empowering of women</b>                         | 10                | 2.6      |
| Create community awareness                         | 9                 | 2.4      |
| Improve health services in the facility            | 9                 | 2.4      |
| Health education                                   | 5                 | 1.3      |
| Others                                             | 31                | 8.2      |

medRxiv preprint doi: <https://doi.org/10.1101/2024.01.18.24301357>; this version posted January 20, 2024. The copyright holder for this preprint (which was not certified by peer review) is the author/funder, who has granted medRxiv a license to display the preprint in perpetuity. It is made available under a [CC-BY-NC 4.0 International license](https://creativecommons.org/licenses/by-nc/4.0/).
